# Supplementary material for: LRP5 in age-related changes in vascular and alveolar morphogenesis in the lung
Source: publisher site journal article supplement (doi:10.18632/aging.101722), 2019-01-05
Supplement: Supplementary file [file aging-v11i1-101722-supplementary-material-SD1.pdf]

SUPPLEMENTARY FIGURE

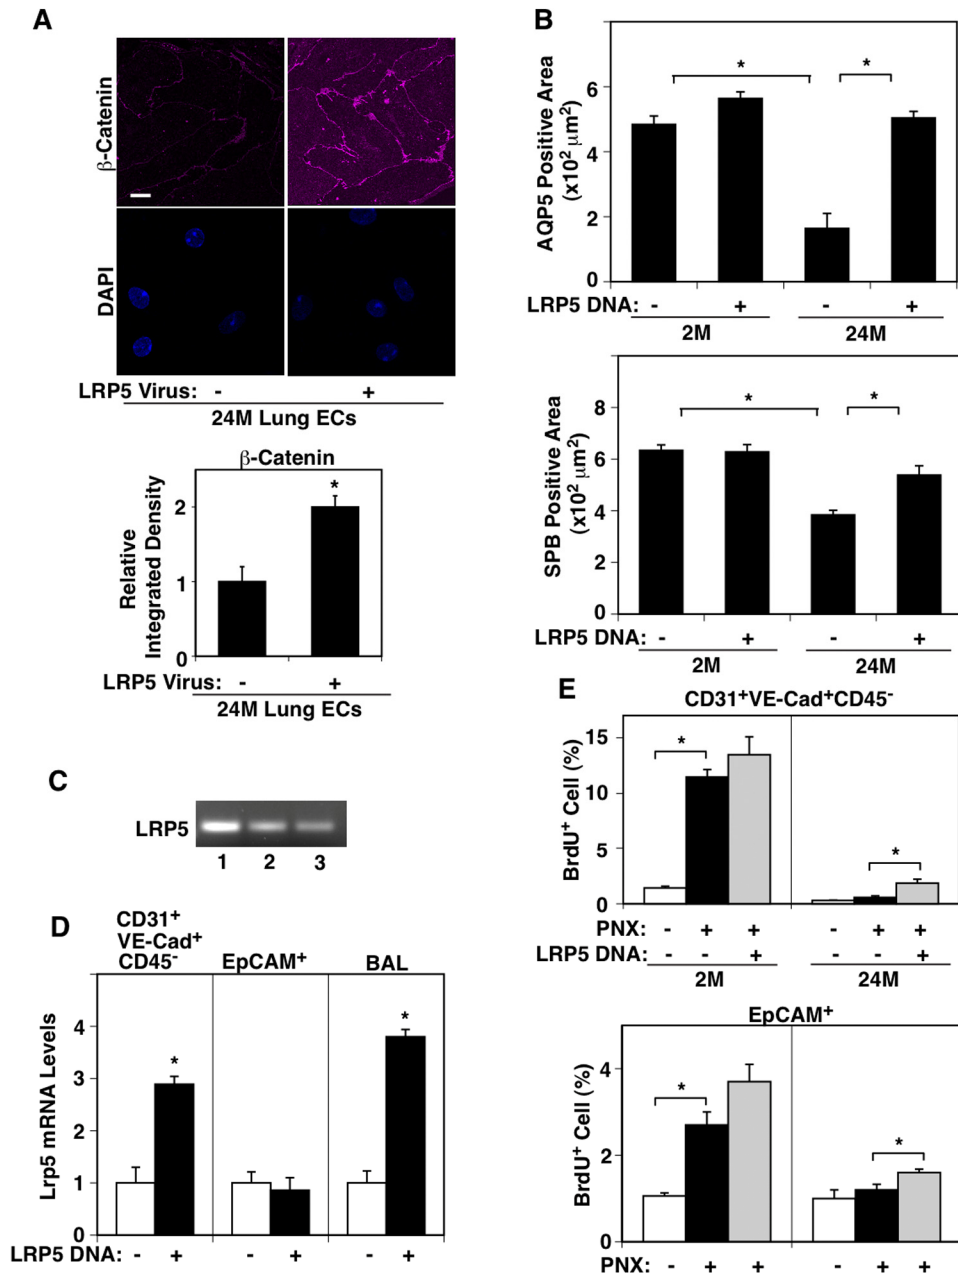

**Supplementary Figure S1. LRP5 mediates age-dependent decline in alveolar epithelial morphogenesis in the mouse lungs.** (A) Immunofluorescence micrographs showing  $\beta$ -catenin expression and distribution in ECs isolated from 24M old mouse lungs treated with lentivirus overexpressing LRP5 (top, scale bar, 10  $\mu$ m). Graph showing the quantification of  $\beta$ -catenin expression in ECs isolated from 24M old mouse lungs treated with lentivirus overexpressing LRP5 (n=4, mean  $\pm$  s.e.m., \*p<0.05). (B) Graphs showing quantification of AQP5- (top) and SPB- (bottom) positive epithelial cell area in the gel implanted on the 2M vs. 24M old mouse lungs or in combination with LRP5 overexpression for 7 days (n=7, mean  $\pm$  s.e.m., \*, p<0.05). (C) Gel image showing LRP5 mRNA expression in CD31<sup>+</sup>, VE-cadherin<sup>+</sup>, CD45<sup>-</sup> ECs (lane 1), EpCAM<sup>+</sup> alveolar epithelial cells (lane 2), and immune cells (lane 3) isolated from 2M old mouse lungs. (D) Graph showing the Lrp5 mRNA levels in CD31<sup>+</sup>, VE-cadherin<sup>+</sup>, CD45<sup>-</sup> ECs, EpCAM<sup>+</sup> alveolar epithelial cells, and immune cells (BAL) isolated from 2M old mouse lungs treated with LRP5 DNA (n=4, \*, mean  $\pm$  s.e.m., \*, p<0.05). (E) Graph showing the % of BrdU-positive CD31<sup>+</sup>, VE-cadherin<sup>+</sup>, CD45<sup>-</sup> ECs (top) and EpCAM<sup>+</sup> alveolar epithelial cells (bottom) isolated from 2M vs. 24M old mouse lungs after PNX or in combination with treatment with LRP5 DNA for 7 days (n=5, \*, mean  $\pm$  s.e.m., \*, p<0.05).
